1 Title

2 *The Colloido-Osmotic Pressure as a useful biomarker of fatal outcome in pregnant*  
3 *COVID-19 patients*

4 Running title

5 *Fatal outcome in Pregnant women with COVID-19*

6 Authors and institutional affiliations

7 B. Zavala-Barrios<sup>1\*\*</sup>, A. Cébulo-Vázquez<sup>2\*\*</sup>, M. García-Espinosa<sup>3</sup>, F. Caldiño-Soto<sup>4</sup>,  
8 Ruth L. Madera Sandoval<sup>9</sup>, L.A. Ramírez-García<sup>5</sup>, I.C. Eláceo-Fernández<sup>8</sup>, O. Moreno-  
9 Álvarez<sup>6</sup>, G.M.L. Guerrero-Avendaño<sup>7</sup>, J.C. Briones-Garduño<sup>8\*</sup>

10 <sup>1</sup>Subdirección de Apoyo al Diagnóstico y Tratamiento, <sup>2</sup>Servicio de Medicina

11 Genómica, <sup>7</sup>Dirección General, <sup>8</sup>Servicio de Ginecología y Obstetricia, Hospital

12 General de México “Dr. Eduardo Liceaga”. Ciudad de Mexico, Mexico

13 <sup>3</sup>Servicio de complicaciones de la segunda mitad del embarazo, <sup>4</sup>División Obstetricia.

14 <sup>5</sup>Dirección Médica, <sup>6</sup>Dirección General. UMAE Hospital de Gineco-Obstetricia No. 4

15 “Dr. Luis Castelazo Ayala”. Instituto Mexicano del Seguro Social (IMSS). Ciudad de

16 Mexico, Mexico.

17 <sup>9</sup>Unidad de Investigación Médica en Inmunoquímica, UMAE Hospital de Especialidades,

18 Centro Médico Nacional Siglo XXI. IMSS. Ciudad de México, México.

19 \*Corresponding author

20 J.C. Briones-Garduño

21 E-mail: [drcarlosbriones@yahoo.com.mx](mailto:drcarlosbriones@yahoo.com.mx)

22 Cel. 52 55 4458 4640

23 \*\*These authors contributed equally

24 Keywords: COVID-19, pregnancy, USG, Doppler, Blood Gas Test.

NOTE: This preprint reports new research that has not been certified by peer review and should not be used to guide clinical practice.

25 **Abstract**

26 Background: Pregnancy was considering a health condition that could support high  
27 severity in COVID-19, among others the cardiologic and respiratory systems express  
28 some physiologic change in the pregnant women and could specially affected in COVID-  
29 19. Pregnant women characteristically have an increase volume of blood, with a higher  
30 cardiac output and lower peripheral vascular resistance, these could be negative affected  
31 by hypoalbuminemia frequently observed in COVID-19. Then, an early recognition of  
32 hypoalbuminemia in pregnant women with COVID-19 would help us to predict fatal  
33 outcome. Objective: We conduct a study to analyzed the demographic, clinical, blood gas  
34 test results, laboratory and ultrasonographic doppler data in pregnant women with  
35 COVID-19 that demand medical attention for labor. Study design: Ninety-two pregnant  
36 women with COVID-19 were included in our study from may 30<sup>th</sup> 2020 to august 12<sup>th</sup>  
37 2022, and data was analyzed in survival and fatal outcome patients. Normality test were  
38 applied to data and parametric or non-parametric test were used to determine statistical  
39 difference between or among data. Results: Demographic and clinical data were quite  
40 similar between survival and fatal outcome pregnant patients with COVID-19. Also,  
41 blood gas test shown similar results among groups (asymptomatic, mild, or severe  
42 patients who survive COVID-19 or fatal outcome patients). We observed that serum  
43 albumin was consistently low in pregnant patients with fatal outcome by COVID-19, then  
44 based on Total Protein concentration in serum we calculated the colloido-osmotic  
45 pressure and we evaluate its utility as predictor of fatal outcome. ROC analysis and  
46 Kaplan-Meier of survival curves suggest that the colloido-osmotic pressure could be a  
47 potential predictor. Also, we observed an association of low colloido-osmotic pressure  
48 and low amniotic fluid index. Conclusion: Our study suggests that early evaluation of

49 pregnant with COVID-19 must include the calculation of colloido-osmotic pressure and  
50 the doppler analysis to early recognition of fatal outcome in pregnant women with  
51 COVID-19.

52

## 53 Introduction

54 Since 2019 the high number of persons with SARS-CoV-2 result in a pandemic  
55 emergency with loss of millions of lives <sup>1</sup>. Fatal outcome by COVID-19 has been  
56 associated with certain comorbidities such as obesity or hypertension among others, also  
57 pregnant women may experience a high fatality rate probably because a high  
58 susceptibility to inflammation <sup>2</sup>. During pregnancy, the immune response develops an  
59 immunological tolerance and a high level of regulation to inflammatory response,  
60 however this delicate balance could negative affected in pregnant women with COVID-  
61 19 <sup>3</sup>. Also, a profound physiologic regulation in other systems can be observed in  
62 pregnancy, which includes the circulatory and respiratory systems <sup>4,5</sup>. Pregnant women  
63 characteristically have an increase volume of blood, with a higher cardiac output and  
64 lower peripheral vascular resistance, also, pregnant women tend to develop a respiratory  
65 alkalosis with pH between normal limits, and all these characteristics could be negative  
66 affected by COVID-19.

67 COVID-19-associated deaths during pregnancy was increasing worldwide, Karimi et al  
68 reported 153 deaths out of 11758 pregnant and postpartum women with COVID-19  
69 (1.3%). However, the mortality rate is differential between high- or middle-income  
70 countries. The high-income countries show a mortality rate about 0.19%, while in middle-  
71 income countries was as high as 8.51% <sup>6</sup>. In Mexico, from April 2022 to August 2021,  
72 389 maternal deaths by COVID-19 were recorded in a population of 20329 pregnant and  
73 postpartum women (1.9%) <sup>7</sup>.

74 Demographic data in pregnant women with COVID-19 shows that they are frequently  
75 older than 31 years old <sup>8</sup>, with a Body Mass Index >30, multiple pregnancy and  
76 hypertension <sup>8-10</sup>. In addition, some social condition in mild-income countries could lead

77 to undernutrition especially in pregnant women, and leading to poor immune response  
78 against COVID-19 <sup>11,12</sup>. Undernutrition could be recognized by low serum albumin,  
79 which is a good predictor for negative outcomes after surgeries <sup>13</sup>, or infection disease as  
80 COVID-19 <sup>14</sup>.

81 In addition, certain laboratory parameters in pregnant women with COVID-19 are useful  
82 to detect high risk of fatal outcome, among these parameters the leucocyte count <sup>15</sup>,  
83 platelet count <sup>16</sup> or neutrophil-lymphocyte ratio (NLR)<sup>17</sup> had been reported. Likewise, the  
84 evaluation of arterial blood gas parameters is essential to evaluate pregnant women with  
85 COVID-19, however, a low number of studies shows the arterial blood gas test in  
86 pregnant women with COVID-19. Also, it has been reported that some chemistry  
87 parameters can be useful for early detection of severe COVID-19, among them the serum  
88 values of creatinine <sup>18</sup>, procalcitonin (PCT) <sup>19</sup> or albumin <sup>20</sup> had been reported, however,  
89 poor analysis is available for pregnant women with COVID-19. Specially the  
90 hypoalbuminemia could result in negative changes in pregnant women because it led to  
91 a low Colloido-Osmotic Pressure (cCOP). This is a pressure exerted by the protein on the  
92 capillary membranes, and could be calculated using the formula 1 of Landis-  
93 Pappenheimer, and fatal outcome in trauma patients is frequently observed in patients  
94 with values as low as <15 mmHg of cCOP <sup>21</sup>. A low cCOP could limit the maternal-fetal  
95 interchange, compromise the placental perfusion and altering the microvasculature in  
96 chorionic villi <sup>22</sup>, however, all these changes could closely monitored by doppler  
97 ultrasonography, following the blood flow in the: Umbilical artery (UA), uterine artery  
98 (UAT), Fetal Middle Cerebral Artery (FMCA), or Amniotic Fluid Index (AFI). Until  
99 now, there are few studies that include the ultrasonographic evaluation in pregnant

100 women with COVID-19, and the few reported no differences between SARS-CoV-2-  
101 positive pregnant women and controls <sup>23</sup>.  
102 Our study analyzed demographic, clinical, laboratory, arterial blood gas test and doppler  
103 data in pregnant women with COVID-19 who survive or got a fatal outcome, the results  
104 suggest that cCOP can early detect pregnant women with COVID-19 with high  
105 probability of having a fatal outcome.

## 106 **Material and methods**

### 107 *Patients*

108 This study was conducted by the "Servicio de Ginecología y Obstetricia" at the Hospital  
109 General de Mexico "Dr. Eduardo Liceaga" (HGM, Research project: *DI/20112/04/45*),  
110 and the Servicio de complicaciones de la segunda mitad del embarazo, División  
111 Obstetricia, UMAE Hospital de Gineco-Obstetricia No. 4 "Dr. Luis Castelazo Ayala"  
112 (UMAE HGO-4 IMSS. Research project: *R-2020-785-095*). After obtaining a signed  
113 informed consent letter, ninety-two women were enrolled and assigned to one of three  
114 groups: a) asymptomatic, n=20, b) mild COVID-19, n=56, c) severe COVID-19, n=16,  
115 then 6 patients in the severe COVID-19 group got a fatal outcome and was analyzed as a  
116 different group. The COVID-19 diagnosis was based on clinical characteristics and  
117 positive RT-PCR test for SARS-CoV-2 or radiographic images compatible with COVID-  
118 19 disease. Demographic, Clinical and Comorbidities features were recorded.

### 119 *Blood sample collection*

120 Our study is in accordance with the World Medical Association's Declaration of Helsinki.  
121 After the patients signed the informed consent letter, blood specimens were collected in  
122 silicone-coated tubes (EDTA or heparinized tubes, BD Vacutainer, N. J, USA), samples

123 were processed immediately after collection.

#### 124 *Arterial Blood Gas test*

125 Heparin blood samples were obtained and blood gas analysis was performed on an  
126 ABL90 Flex Plus blood gas analyzer (Radiometer Medical ApS, Bronshoj, Denmark)  
127 within 30 min of collect.

#### 128 *Doppler test*

129 Doppler analysis was as D'Antonio reported <sup>24</sup>, we performed the analysis using a  
130 Samsung HS40 (Samsung Healthcare, N.J, USA) or a Chison EBit 50 (Chison, Jiangsu,  
131 China) ultrasound machines. Data was recorded during fetal quiescence, without fetal  
132 tachycardia, with the insonation angle kept as close to 0° as possible. FMCA was  
133 examined at the point at which it passes the sphenoid wing, close to the circle of Willis,  
134 and the UA was examined at a free loop of the umbilical cord. To record the UAT  
135 Doppler, the transducer was placed over the iliac fossa and the course of the uterine  
136 arteries was followed from the lateral pelvic wall across external iliac artery using color  
137 Doppler. Pulsed Doppler was then applied 1 cm medial to the crossover point. When three  
138 similar consecutive waveforms were obtained, the PI was measured, and the mean value  
139 of the left and right uterine artery PI calculated.

#### 140 *Statistical analysis*

141 Statistical analysis was performed using GraphPad Prism® version 7 software (GraphPad  
142 Software, San Diego, CA, USA) and the R i386 3.5.2 terminal (Microsoft corp., Boston,  
143 MA, USA.). Categorical variables were expressed as percentages (%), and compared by  
144 Fisher's exact test. Non-parametric ANOVA (Kruskal–Wallis test) with Dunn's posttest

145 was applied. Spearman correlation for interest variables was implemented. A  $p < 0.05$  was  
146 considered statistically significant.

## 147 **Results**

148 Ninety-two pregnant patients with COVID-19 was attended in the HGM and reviewed  
149 with coauthors in the UMAE HGO-4 IMSS, from may 30<sup>th</sup> 2020 to august 12<sup>th</sup> 2022. All  
150 patients got an RT-PCR+ for SARS-CoV-2 or radiographic imagen diagnostic for SARS-  
151 CoV-2 infection. Twenty of the ninety-two pregnant patients in labor without any clinical  
152 sign of COVID-19 got a positive result for SARS-CoV-2 PCR test, these asymptomatic  
153 patients were included in our study. Table 1 show clinical and laboratory characteristics,  
154 no statistical difference was observed for age, body mass index, gestational age, trimester  
155 of gestation, weight newborn, or Apgar score among the groups, however, prolonged  
156 stays in hospital were observed in severe or fatal outcome patients with COVID-19 than  
157 in asymptomatic patients positive for SARS-CoV-2. Also, we observed a similar number  
158 of leucocytes and platelets among groups (Table 1). However, the percentage of PMN  
159 was higher in patients with severe COVID-19 than in asymptomatic pregnant women.  
160 Table 2 shows the results of arterial blood gas test. No statistical significance was  
161 observed in pH, PaO<sub>2</sub>, saturation of O<sub>2</sub> or lactate among groups, however, severe patients  
162 show a higher CO<sub>2</sub> value than mild patients ( $p = 0.005$ ), also, the BE was lower in the mild  
163 group than in fatal outcome patients ( $p = 0.02$ ). Results in Table 2 shows that pregnant  
164 women developing a respiratory alkalosis probably due by hyperventilation, this  
165 respiratory condition is quite frequent in pregnant patients and pH values are in normal  
166 limits.



167 Regarding chemistry parameters, we observed that creatinine and D-Dimer concentration  
168 were similar among groups (Table 3), however, procalcitonin was higher in severe  
169 COVID-19 than in asymptomatic patients ( $p=0.040$ ). Also, the asymptomatic patients  
170 show the highest serum albumin concentration, while the lowest serum albumin was in  
171 fatal outcome pregnant women with COVID-19 (Table 3).

172 Fig. 1A shows the cCOP in mild-severe COVID-19 pregnant women is higher than in  
173 fatal outcome pregnant women with COVID-19. Moreover, moderate correlation ( $r=$   
174  $0.45$ ) among cCOP and amniotic fluid index, was observed (fig. 1B) in patients with mild,  
175 severe and fatal outcome.

176 Also, the ROC curve analysis show that the AUC was 53.2%, and the optimal cutoff was  
177 calculated in accordance with Youden index 15.7, with a confidence interval of 77.8%,  
178 57.1%. Also, a survival curve of cCOP was analyzed. Kaplan-Meier of survival curves  
179 were made according to the optimal cutoff, and hazard ratio expressed in percentage,  
180  $p<0.05$ . The median days of survival was 340 for the lower risk group and a 31% of risk  
181 for the patients with value greater than 15.7.

182 Fig. 2 shows the ultrasonographic analysis in survivor pregnant women with COVID-19  
183 or asymptomatic patients SARS-CoV-2 positive. Similar results were observed for UA,  
184 UAT, and FMCA among groups, however, the amniotic fluid index show statistical  
185 difference, were asymptomatic patients show a higher index than in severe COVID-19  
186 patients ( $p=0.01$ ) or higher index in mild COVID-19 patients than in severe COVID-19  
187 patients ( $p=0.02$ ).

## 188 **Discussion**

### 189 *Principal Findings*

190 The early recognition of severe or critical COVID-19 in pregnant women would help us  
191 to get a lower maternal mortality by COVID-19, or predict fatal outcome in pregnant  
192 women with COVID-19. Our study shows that long stay in hospital (media=14-15 days)  
193 is characteristic of patients with severe COVID-19 or fatal outcome (Table 1). We also  
194 observed that arterial blood gas test was quite similar among pregnant women with  
195 COVID-19 even in those who got a fatal outcome (Table 2). In agreement with the  
196 literature hypoalbuminemia was noted specially in patients with severe COVID-19 or  
197 those who got fatal outcome (Table 3). We calculated the Colloido-osmotic pressure in  
198 mild and severe COVID-19 and compared with patients with fatal outcome, a significant  
199 difference was observed between those groups, and association between cCOP and  
200 amniotic fluid index was observed (Figure 1). Unfortunately, a doppler test was not  
201 applied on patients with fatal outcome by COVID-19, however, we observed that the  
202 amniotic fluid index was lower according to severity of COVID-19 (Figure 2).

### 203 **Results**

204 Several studies show the mean of age of pregnant women with COVID-19 is around 30  
205 years old <sup>8,15,25-31</sup>, and most pregnant women with COVID-19 were aged between 20 to  
206 39 years <sup>9</sup>, our study also show that pregnant women with COVID-19 or asymptomatic  
207 patients were around 30 years old (Table 1). Comorbidities as obesity has been associated  
208 to suffer severe COVID-19 in pregnant women <sup>8</sup>, and been in a higher risk for maternal  
209 death <sup>32</sup>, and some studies show that BMI over 30 is frequently observed in pregnant  
210 women COVID-19 patients <sup>28,31</sup>, our study also observed this condition (Table 1). The  
211 most of literature show that pregnant women with COVID-19 have a mean of gestational  
212 age around 30 weeks <sup>28,29</sup>, or higher gestational age than 30 weeks <sup>26,27</sup>, as we expect the  
213 most of maternal death in pregnant women with COVID-19 has been observed in the  
214 third trimester of pregnancy, however, other studies did not show a high number of fatal

215 outcomes by COVID-19 in the third trimester<sup>33-36</sup>. Maternal mortality could be as low as  
216 0.2 to 2%<sup>10,37-39</sup>, or as high as 10 to 20%<sup>6,40-42</sup> according with low- or middle-income<sup>42-</sup>  
217 <sup>44</sup>. Our study shows similar data for gestational age, fatal outcome by trimester and  
218 maternal mortality as a middle-income country, these observation in a sense validate our  
219 study and could help to increase the number of observations for pregnant women with  
220 COVID-19 in the very first wave when collection of data was so difficult.

221 Early evaluation of blood gas test in pregnant women with COVID-19 seems to be critical  
222 and could help to recognize severity. Both alkalosis and acidosis were observed in  
223 patients with COVID-19 in general population, and alkalosis was observed in 54.3% of  
224 the subjects<sup>45</sup>. Also, ketoacidosis has been reported in pregnant women with COVID-19  
225 which is associated with diabetes, hyperglycemia and ketosis<sup>46,47</sup>. However, our result  
226 did not show great differences among groups, indicating that blood gas parameters was  
227 not altered even with variants of SARS-CoV-2 that express high maternal mortality. More  
228 observations must do it to clarify this observation.

229 Blood cell count had been analyzed in patients with COVID-19, some authors show that  
230 white blood cell count is higher in pregnant than in non-pregnant women with COVID-  
231 19<sup>27</sup>, however, other studies show that leucocytosis was not observed in pregnant women  
232 with COVID-19<sup>27,35</sup>, in contrast, some pregnant women with COVID-19 show  
233 lymphopenia<sup>48</sup>. In agreement with Wang Z et. al. and Yan J et. al. we did not observe  
234 great differences in leucocytes counts among the groups. Finally, has been reported that  
235 a lower platelet count is observed in patients with severe COVID-19<sup>16,18</sup>, while other  
236 study show that the platelet count was similar in pregnant women with and without  
237 SARS-CoV-2 infection<sup>49</sup>. In agreement with Covali R et. al. we did not observed  
238 difference in the platelet count of pregnant women with COVID-19, no difference was

239 observed among groups by severity or fatal outcome, this is probably because the  
240 relatively small number of patients. More studies are necessary to clarify if low platelet  
241 count is a good predictor of fatal outcome in pregnant women.

242 Shmakov RG et. al. shows a similar D-Dimer concentration among asymptomatic, mild,  
243 moderate and severe COVID-19 in pregnant women <sup>28</sup>, and our study agrees with this  
244 observation. Another potential biomarker is the PCT, however, the value of this  
245 biomarker to predict severity in COVID-19 show some contradictory results in general  
246 population <sup>19</sup>, and in pregnant women with COVI-19, PCT levels was similar between  
247 pregnant and non-pregnant women with COVID-19 <sup>41,50</sup>, while some other study show a  
248 difference between them <sup>27</sup>. Because the PCT was similar among mild, moderate and  
249 severe COVID-19 in pregnant women <sup>28</sup>, the result suggest that PCT is not able to  
250 discriminate the mild from severe COVID-19 in pregnant women, our study agrees with  
251 this observation, we observed that the highest PCT concentration was in the mild cases,  
252 in the mild group we observed patients with PCT values quite similar to severe COVID-  
253 19 patients (range 0.010-11.0 ng/mL) and a subgroup of mild COVID-19 patients with  
254 high values of PCT (918.0-5227.0 ng/mL), suggesting that this second subgroup got a  
255 bacterial infection, however, we could not get a positive bacterial culture on them,  
256 interestingly, none of this potential over infected patients got a fatal outcome, suggesting  
257 that even in the case of double infection the immune system of pregnant women will be  
258 sufficient to solve the infection challenge.

259 Hypoalbuminemia has been associated to disease severity in COVID-19 <sup>20,28,51</sup>, the  
260 expression of hypoalbuminemia on admission is more frequent in non-survivors than  
261 survivors, and could be useful as an early predictor of mortality in COVID-19 <sup>52-54</sup>. In  
262 contrast, a high level of albumin on admission is associated with a lower risk of Acute

263 Respiratory Distress Syndrome and admission to ICU <sup>53</sup>. Lower albumin concentration  
264 was reported in pregnant than in non-pregnant women with COVID-19 without fatal  
265 outcome <sup>27</sup>, our results show that a hypoalbuminemia as low as 2.5 could result in low  
266 colloido-osmotic pressure and finally a fatal outcome. The colloido-osmotic pressure is  
267 easily evaluated among patients, and our study propose its routine analysis to predict fatal  
268 outcome in pregnant women with COVID-19. Moreover, low cCOP in COVID-19 could  
269 lead to impaired placental perfusion. It has been reported that SARS-CoV-2 infection  
270 does not affect the blood flow in the umbilical vein <sup>55</sup>, also, in pregnant women recovered  
271 from COVID-19 the pulsatility and resistance indices of umbilical and uterine artery show  
272 a significant increase than in controls <sup>56</sup>. In contrast, Soto-Torres et. al. report that Doppler  
273 evaluation was similar between pregnant women with SARS-CoV-2 infection and  
274 controls <sup>23</sup>. In agreement with Soto-Torres et. al. we observed that the umbilical artery,  
275 uterine artery, and fetal middle cerebral artery the blood flow were similar in pregnant  
276 and non-pregnant COVID-19 women, however, we observed that the Amniotic Fluid  
277 Index was lower in severe than in mild or asymptomatic COVID-19 patients, this lower  
278 amniotic fluid index in severe COVID-19 patients could expressed or been the Fetal  
279 Inflammatory Response Syndrome by viral infection.

280

### 281 ***Clinical implications***

282 Two conditions could explain the high maternal mortality in our hospital a) because we  
283 are in a middle-income country and b) because our hospital is a national reference center.  
284 We were able to classify our patients in asymptomatic, mild, and severe COVID-19  
285 patients; however, some clinical characteristics of our patients were quite similar among  
286 groups as age, BMI, gestational age, weight newborn, Apgar score etc. indicating that  
287 those characteristics have low value to early recognize patients with high potential for a

288 fatal outcome. Also, our study show that pregnant women tend to respiratory alkalosis  
289 that is not necessarily deteriorated by COVID-19. Despite a limited respiratory condition  
290 in pregnant women, it seems that gas test in pregnant women with COVID-19 is similar  
291 than in women in general population with COVID-19. Some other laboratory analysis as  
292 the blood count was also analyzed, we did not observe leukocytosis or lymphopenia in  
293 pregnant women with COVID-19, and no association with severity was observed,  
294 probably because a small number of patients in our study. We observed the highest  
295 neutrophilia in pregnant women with severe COVID-19, however, neutropenia and not  
296 neutrophilia was observed in pregnant women with COVID-19 and fatal outcome.  
297 Neutrophils are important innate cells that participate in many mechanisms related with  
298 inflammation, its high or low number in pregnant women with COVID-19 seems to be  
299 important for limit the infection, however, we need more analysis in pregnant women to  
300 clarify if neutropenia and neutrophilia are supporter of pathophysiology in COVID-19.  
301 Our results suggest that Basic Doppler evaluation could be useful to early recognition of  
302 severe COVID-19 in pregnant women.

303

#### 304 ***Research implications***

305 We do not know when the next pandemic comes, but patients with comorbidities or  
306 special conditions as pregnancy will be affected. Due the complex condition in prenatal  
307 surveillance, labor and postpartum period during pandemic for COVID-19 many  
308 opportunities of do deeper analysis of data o searching for a no-conventional assessment  
309 were lost, and data in pregnant women with COVID-19 is scarce. Medical attention of  
310 pregnant patients must include a holistic view, with strict attention to ethical and patient's  
311 rights, and then collect any data that potentially could help to understand the new disease  
312 like COVID-19 and minimize the fatal outcomes.

313

314 ***Strengths and limitations***

315 Our study has some limitations and strengths, the number of observations is relatively  
316 low (n=92) with six fatal outcomes included (6.5%), because early in the pandemic a  
317 medical treatment was not established and medical support was apply after some days of  
318 the initial COVID-19 symptoms a high percentage of fatal outcome was observed,  
319 however, our study also show demographic, clinical and laboratory data observed at the  
320 very early time (in the second wave) of pandemic of COVID-19 in Mexico, and when  
321 vaccination was not available, these conditions could help us to understand the natural  
322 progression in pregnant women with COVID-19.

323

324 ***Conclusions***

325 A high number of comorbidities is observed in COVID-19 patients with high severity,  
326 and also the pregnancy could allow a severe presentation of COVID-19. However, the  
327 frequency of severe cases in pregnant women with COVID-19 is similar than in general  
328 population<sup>15,41,57</sup>, due to the pandemic condition many studies in pregnant women with  
329 COVID-19 show missing or not collected data, our data show that hypoalbuminemia and  
330 the cCOP could help to early recognize patients with high risk of fatal outcome, more  
331 studies are necessary to know if pregnancy must not take as a comorbidity that increase  
332 the risk of severe COVID-19.

333

334 **Contributors**

335 BZB, ACV and JCBG conceived and designed the study and contributed to data analysis.  
336 BZB and ACV wrote the first version of manuscript. MGE, FCS, LARG, RLMS, JCBG,  
337 OMA, and GMLGA contributed to a critical revision of the report. MGE, FCS, LARG,  
338 ICEF, JCBG, BZB, and OMA contributed to the clinical evaluation of patients and  
339 supervision of medical treatments and patient care. RLMS contributed to do the statistical  
340 analysis and graph data. All authors reviewed the final version. JCBG reviewed and  
341 approved the final version.

342

343 **Acknowledgments**

344 The authors extend gratitude to the staff at Gynecology & Obstetrics Department in the  
345 General Hospital of Mexico “Dr. Eduardo Liceaga” and Gynecology & Obstetric  
346 Hospital No. 4 UMAE “Dr. Luis Castelazo Ayala”.

347

348 Declaration of interests

349 All authors declare no competing interests.

350

351

**References**

352

- 353 1. WHO. WHO Coronavirus (COVID-19) Dashboard. <https://covid19.who.int/>
- 354 2. Adab P, Haroon S, O'Hara ME, Jordan RE. Comorbidities and covid-19. *BMJ*.  
355 Jun 15 2022;377:o1431. doi:10.1136/bmj.o1431
- 356 3. Cerbulo-Vazquez A, Garcia-Espinosa M, Briones-Garduno JC, et al. The  
357 percentage of CD39+ monocytes is higher in pregnant COVID-19+ patients than in  
358 nonpregnant COVID-19+ patients. *PLoS One*. 2022;17(7):e0264566.  
359 doi:10.1371/journal.pone.0264566
- 360 4. Hegewald MJ, Crapo RO. Respiratory physiology in pregnancy. *Clin Chest Med*.  
361 Mar 2011;32(1):1-13. doi:10.1016/j.ccm.2010.11.001
- 362 5. LoMauro A, Aliverti A. Respiratory physiology in pregnancy and assessment of  
363 pulmonary function. *Best Pract Res Clin Obstet Gynaecol*. Jun 27  
364 2022;doi:10.1016/j.bpobgyn.2022.05.007
- 365 6. Karimi L, Makvandi S, Vahedian-Azimi A, Sathyapalan T, Sahebkar A. Effect of  
366 COVID-19 on Mortality of Pregnant and Postpartum Women: A Systematic Review and  
367 Meta-Analysis. *J Pregnancy*. 2021;2021:8870129. doi:10.1155/2021/8870129
- 368 7. Epidemiología CNEdGySRDGD. Aviso Epidemiológico COVID-19.  
369 [https://www.gob.mx](https://www.gob.mx/uploads/attachment_data/file) › uploads › attachment › file
- 370 8. Epelboin S, Labrosse J, De Mouzon J, et al. Obstetrical outcomes and maternal  
371 morbidities associated with COVID-19 in pregnant women in France: A national  
372 retrospective cohort study. *PLoS Med*. Nov 2021;18(11):e1003857.  
373 doi:10.1371/journal.pmed.1003857
- 374 9. Galang RR, Newton SM, Woodworth KR, et al. Risk Factors for Illness Severity  
375 Among Pregnant Women With Confirmed Severe Acute Respiratory Syndrome  
376 Coronavirus 2 Infection-Surveillance for Emerging Threats to Mothers and Babies  
377 Network, 22 State, Local, and Territorial Health Departments, 29 March 2020-5 March  
378 2021. *Clin Infect Dis*. Jul 15 2021;73(Suppl 1):S17-S23. doi:10.1093/cid/ciab432
- 379 10. Overton EE, Goffman D, Friedman AM. The Epidemiology of COVID-19 in  
380 Pregnancy. *Clin Obstet Gynecol*. Mar 1 2022;65(1):110-122.  
381 doi:10.1097/GRF.0000000000000674
- 382 11. James PT, Ali Z, Armitage AE, et al. The Role of Nutrition in COVID-19  
383 Susceptibility and Severity of Disease: A Systematic Review. *J Nutr*. Jul 1  
384 2021;151(7):1854-1878. doi:10.1093/jn/nxab059
- 385 12. Don BR, Kaysen G. Serum albumin: relationship to inflammation and nutrition.  
386 *Semin Dial*. Nov-Dec 2004;17(6):432-7. doi:10.1111/j.0894-0959.2004.17603.x
- 387 13. Gibbs J, Cull W, Henderson W, Daley J, Hur K, Khuri SF. Preoperative serum  
388 albumin level as a predictor of operative mortality and morbidity: results from the  
389 National VA Surgical Risk Study. *Arch Surg*. Jan 1999;134(1):36-42.  
390 doi:10.1001/archsurg.134.1.36



- 391 14. Mentella MC, Scaldaferrri F, Gasbarrini A, Miggiano GAD. The Role of Nutrition  
392 in the COVID-19 Pandemic. *Nutrients*. Mar 27 2021;13(4)doi:10.3390/nu13041093
- 393 15. Amini Moghadam S, Dini P, Nassiri S, Motavaselian M, Hajibaba M, Sohrabi M.  
394 Clinical features of pregnant women in Iran who died due to COVID-19. *Int J Gynaecol*  
395 *Obstet*. Feb 2021;152(2):215-219. doi:10.1002/ijgo.13461
- 396 16. Lippi G, Plebani M, Henry BM. Thrombocytopenia is associated with severe  
397 coronavirus disease 2019 (COVID-19) infections: A meta-analysis. *Clin Chim Acta*. Jul  
398 2020;506:145-148. doi:10.1016/j.cca.2020.03.022
- 399 17. Lasser DM, Chervenak J, Moore RM, et al. Severity of COVID-19 Respiratory  
400 Complications during Pregnancy are Associated with Degree of Lymphopenia and  
401 Neutrophil to Lymphocyte Ratio on Presentation: A Multicenter Cohort Study. *Am J*  
402 *Perinatol*. Oct 2021;38(12):1236-1243. doi:10.1055/s-0041-1732421
- 403 18. Tufa A, Gebremariam TH, Manyazewal T, et al. Limited value of neutrophil-to-  
404 lymphocyte ratio and serum creatinine as point-of-care biomarkers of disease severity  
405 and infection mortality in patients hospitalized with COVID-19. *PLoS One*.  
406 2022;17(10):e0275391. doi:10.1371/journal.pone.0275391
- 407 19. Wolfisberg S, Gregoriano C, Schuetz P. Procalcitonin for individualizing  
408 antibiotic treatment: an update with a focus on COVID-19. *Crit Rev Clin Lab Sci*. Jan  
409 2022;59(1):54-65. doi:10.1080/10408363.2021.1975637
- 410 20. Johnson AS, Winlow W. COVID-19 vulnerabilities are intensified by declining  
411 human serum albumin levels. *Exp Physiol*. Jul 2022;107(7):674-682.  
412 doi:10.1113/EP089703
- 413 21. Alberto Basilio Olivares JCB, Jesús Antonio Jiménez Origel,, Ponce MADdL. La  
414 presión coloidosmótica (PCO) como indicador  
415 pronóstico en trauma. Reporte preliminar. *Rev Asoc Mex Med Crit y Ter Int*.  
416 2012;26(4):230-233.
- 417 22. Acharya G, Sonesson SE, Flo K, Rasanen J, Odibo A. Hemodynamic aspects of  
418 normal human fetoplacental (umbilical) circulation. *Acta Obstet Gynecol Scand*. Jun  
419 2016;95(6):672-82. doi:10.1111/aogs.12919
- 420 23. Soto-Torres E, Hernandez-Andrade E, Huntley E, Mendez-Figueroa H, Blackwell  
421 SC. Ultrasound and Doppler findings in pregnant women with SARS-CoV-2 infection.  
422 *Ultrasound Obstet Gynecol*. Jul 2021;58(1):111-120. doi:10.1002/uog.23642
- 423 24. D'Antonio F, Rizzo G, Gustapane S, et al. Diagnostic accuracy of Doppler  
424 ultrasound in predicting perinatal outcome in pregnancies at term: A prospective  
425 longitudinal study. *Acta Obstet Gynecol Scand*. Jan 2020;99(1):42-47.  
426 doi:10.1111/aogs.13705
- 427 25. Dawood FS, Varner M, Tita A, et al. Incidence and Clinical Characteristics of and  
428 Risk Factors for Severe Acute Respiratory Syndrome Coronavirus 2 (SARS-CoV-2)  
429 Infection Among Pregnant Individuals in the United States. *Clin Infect Dis*. Jul 6  
430 2022;74(12):2218-2226. doi:10.1093/cid/ciab713
- 431 26. Zhang J, Zhang Y, Ma Y, et al. The associated factors of cesarean section during  
432 COVID-19 pandemic: a cross-sectional study in nine cities of China. *Environ Health Prev*  
433 *Med*. Oct 10 2020;25(1):60. doi:10.1186/s12199-020-00899-w
- 434 27. Wang Z, Wang Z, Xiong G. Clinical characteristics and laboratory results of  
435 pregnant women with COVID-19 in Wuhan, China. *Int J Gynaecol Obstet*. Sep  
436 2020;150(3):312-317. doi:10.1002/ijgo.13265

- 437 28. Shmakov RG, Prikhodko A, Polushkina E, et al. Clinical course of novel COVID-  
438 19 infection in pregnant women. *J Matern Fetal Neonatal Med.* Dec 2022;35(23):4431-  
439 4437. doi:10.1080/14767058.2020.1850683
- 440 29. Pierce-Williams RAM, Burd J, Felder L, et al. Clinical course of severe and  
441 critical coronavirus disease 2019 in hospitalized pregnancies: a United States cohort  
442 study. *Am J Obstet Gynecol MFM.* Aug 2020;2(3):100134.  
443 doi:10.1016/j.ajogmf.2020.100134
- 444 30. Capobianco G, Saderi L, Aliberti S, et al. COVID-19 in pregnant women: A  
445 systematic review and meta-analysis. *Eur J Obstet Gynecol Reprod Biol.* Sep  
446 2020;252:543-558. doi:10.1016/j.ejogrb.2020.07.006
- 447 31. Afshar Y, Gaw SL, Flaherman VJ, et al. Clinical Presentation of Coronavirus  
448 Disease 2019 (COVID-19) in Pregnant and Recently Pregnant People. *Obstet Gynecol.*  
449 Dec 2020;136(6):1117-1125. doi:10.1097/AOG.0000000000004178
- 450 32. Mendez-Dominguez N, Santos-Zaldivar K, Gomez-Carro S, Datta-Banik S,  
451 Carrillo G. Maternal mortality during the COVID-19 pandemic in Mexico: a preliminary  
452 analysis during the first year. *BMC Public Health.* Jul 2 2021;21(1):1297.  
453 doi:10.1186/s12889-021-11325-3
- 454 33. Gupta V, Yadav Y, Sharma R, Mishra M, Ambedkar D, Gupta V. Maternal and  
455 Perinatal Outcomes of Hospitalized COVID-19 Positive Pregnant Women. *Cureus.* Feb  
456 2022;14(2):e21817. doi:10.7759/cureus.21817
- 457 34. DeBolt CA, Bianco A, Limaye MA, et al. Pregnant women with severe or critical  
458 coronavirus disease 2019 have increased composite morbidity compared with  
459 nonpregnant matched controls. *Am J Obstet Gynecol.* May 2021;224(5):510 e1-510 e12.  
460 doi:10.1016/j.ajog.2020.11.022
- 461 35. Yan J, Guo J, Fan C, et al. Coronavirus disease 2019 in pregnant women: a report  
462 based on 116 cases. *Am J Obstet Gynecol.* Jul 2020;223(1):111 e1-111 e14.  
463 doi:10.1016/j.ajog.2020.04.014
- 464 36. London V, McLaren R, Jr., Atallah F, et al. The Relationship between Status at  
465 Presentation and Outcomes among Pregnant Women with COVID-19. *Am J Perinatol.*  
466 Aug 2020;37(10):991-994. doi:10.1055/s-0040-1712164
- 467 37. Metz TD, Clifton RG, Hughes BL, et al. Association of SARS-CoV-2 Infection  
468 With Serious Maternal Morbidity and Mortality From Obstetric Complications. *JAMA.*  
469 Feb 22 2022;327(8):748-759. doi:10.1001/jama.2022.1190
- 470 38. Borges Charepe N, Queiros A, Alves MJ, et al. One Year of COVID-19 in  
471 Pregnancy: A National Wide Collaborative Study. *Acta Med Port.* May 2  
472 2022;35(5):357-366. doi:10.20344/amp.16574
- 473 39. Juan J, Gil MM, Rong Z, Zhang Y, Yang H, Poon LC. Effect of coronavirus  
474 disease 2019 (COVID-19) on maternal, perinatal and neonatal outcome: systematic  
475 review. *Ultrasound Obstet Gynecol.* Jul 2020;56(1):15-27. doi:10.1002/uog.22088
- 476 40. Leung C, Simoes ESAC, Oliveira EA. Are in-hospital COVID-19-related  
477 mortality and morbidity in pregnancy associated with gestational age? *Ultrasound Obstet*  
478 *Gynecol.* Aug 2022;60(2):234-242. doi:10.1002/uog.24931
- 479 41. Khoiwal K, Ravi AK, Arora S, et al. Impact of Pregnancy on Susceptibility and  
480 Severity of COVID-19: A Hospital-Based Prospective Observational Study. *Cureus.* Apr  
481 2022;14(4):e24281. doi:10.7759/cureus.24281
- 482 42. Nakamura-Pereira M, Betina Andreucci C, de Oliveira Menezes M, Knobel R,  
483 Takemoto MLS. Worldwide maternal deaths due to COVID-19: A brief review. *Int J*  
484 *Gynaecol Obstet.* Oct 2020;151(1):148-150. doi:10.1002/ijgo.13328

- 485 43. Takemoto MLS, Menezes MO, Andreucci CB, et al. Maternal mortality and  
486 COVID-19. *J Matern Fetal Neonatal Med.* Jun 2022;35(12):2355-2361.  
487 doi:10.1080/14767058.2020.1786056
- 488 44. Maza-Arnedo F, Paternina-Caicedo A, Sosa CG, et al. Maternal mortality linked  
489 to COVID-19 in Latin America: Results from a multi-country collaborative database of  
490 447 deaths. *Lancet Reg Health Am.* Aug 2022;12:100269.  
491 doi:10.1016/j.lana.2022.100269
- 492 45. Sanghani H, Bansal S, Parmar V, Shah R. Study of Arterial Blood Gas Analysis  
493 in Moderate-to-Severe COVID-19 Patients. *Cureus.* Jul 2022;14(7):e26715.  
494 doi:10.7759/cureus.26715
- 495 46. van Amesfoort JE, Werter DE, Painter RC, Hermans FJR. Severe metabolic  
496 ketoacidosis as a primary manifestation of SARS-CoV-2 infection in non-diabetic  
497 pregnancy. *BMJ Case Rep.* Apr 19 2021;14(4)doi:10.1136/bcr-2021-241745
- 498 47. Pikovskiy M, Tan MY, Ahmed A, Sykes L, Agha-Jaffar R, Yu CKH. Euglycaemic  
499 ketoacidosis in pregnant women with COVID-19: two case reports. *BMC Pregnancy  
500 Childbirth.* Jun 16 2021;21(1):427. doi:10.1186/s12884-021-03928-w
- 501 48. Al-Saadi E, Abdunabi MA. Hematological changes associated with COVID-19  
502 infection. *J Clin Lab Anal.* Jan 2022;36(1):e24064. doi:10.1002/jcla.24064
- 503 49. Covali R, Socolov D, Socolov R, et al. Complete Blood Count Peculiarities in  
504 Pregnant SARS-CoV-2-Infected Patients at Term: A Cohort Study. *Diagnostics (Basel).*  
505 Dec 30 2021;12(1)doi:10.3390/diagnostics12010080
- 506 50. Asghar MS, Siddiqui MA, Iqbal S, et al. COVID-19 infection among pregnant  
507 and non-pregnant women: Comparison of biochemical markers and outcomes during  
508 COVID-19 pandemic, A retrospective cohort study. *Ann Med Surg (Lond).* Apr  
509 2022;76:103527. doi:10.1016/j.amsu.2022.103527
- 510 51. Xu Y, Yang H, Wang J, et al. Serum Albumin Levels are a Predictor of COVID-  
511 19 Patient Prognosis: Evidence from a Single Cohort in Chongqing, China. *Int J Gen  
512 Med.* 2021;14:2785-2797. doi:10.2147/IJGM.S312521
- 513 52. Viana-Llamas MC, Arroyo-Espliguero R, Silva-Obregon JA, et al.  
514 Hypoalbuminemia on admission in COVID-19 infection: An early predictor of mortality  
515 and adverse events. A retrospective observational study. *Med Clin (Barc).* May 7  
516 2021;156(9):428-436. doi:10.1016/j.medcli.2020.12.018
- 517 53. Kheir M, Saleem F, Wang C, Mann A, Chua J. Higher albumin levels on  
518 admission predict better prognosis in patients with confirmed COVID-19. *PLoS One.*  
519 2021;16(3):e0248358. doi:10.1371/journal.pone.0248358
- 520 54. Huang J, Cheng A, Kumar R, et al. Hypoalbuminemia predicts the outcome of  
521 COVID-19 independent of age and co-morbidity. *J Med Virol.* Oct 2020;92(10):2152-  
522 2158. doi:10.1002/jmv.26003
- 523 55. Rizzo G, Mappa I, Pietrolucci ME, Lu JLA, Makatsarya A, D'Antonio F. Effect  
524 of SARS-CoV-2 infection on fetal umbilical vein flow and cardiac function: a prospective  
525 study. *J Perinat Med.* May 25 2022;50(4):398-403. doi:10.1515/jpm-2021-0657
- 526 56. Anuk AT, Tanacan A, Yetiskin FDY, et al. Doppler assessment of the fetus in  
527 pregnant women recovered from COVID-19. *J Obstet Gynaecol Res.* May  
528 2021;47(5):1757-1762. doi:10.1111/jog.14726
- 529 57. Hessami K, Homayoon N, Hashemi A, Vafaei H, Kasraeian M, Asadi N. COVID-  
530 19 and maternal, fetal and neonatal mortality: a systematic review. *J Matern Fetal  
531 Neonatal Med.* Aug 2022;35(15):2936-2941. doi:10.1080/14767058.2020.1806817  
532



534 **Table 1. Clinical and laboratory characteristics of pregnant women with COVID-**  
 535 **19**

|                                           | <b>Survivor</b>                     |                             |                               |                                                |                                                                                                                           |
|-------------------------------------------|-------------------------------------|-----------------------------|-------------------------------|------------------------------------------------|---------------------------------------------------------------------------------------------------------------------------|
|                                           | Asymptomatic<br>(n=20) <sup>a</sup> | Mild<br>(n=56) <sup>b</sup> | Severe<br>(n=10) <sup>c</sup> | <b>Fatal<br/>Outcome</b><br>(n=6) <sup>d</sup> | <i>p</i>                                                                                                                  |
| <b>Age (years)</b>                        | 29.1±4.7                            | 28.8±6.8                    | 31.8±4.7                      | 30.5±4.0                                       | ns                                                                                                                        |
| <b>BMI</b>                                | 30.3±6.2                            | 30.5±5.9                    | 28.3±3.9                      | 25.9±4.3                                       | ns                                                                                                                        |
| <b>Gestational<br/>age (Weeks)</b>        | 35.1±7.4                            | 32.5±8.0                    | 30.6±6.7                      | 28.5±6.1                                       | ns                                                                                                                        |
| <b>1<sup>st</sup> trimester</b>           | 1                                   | 2                           | 0                             | 0                                              |                                                                                                                           |
| <b>2<sup>nd</sup> trimester</b>           | 1                                   | 6                           | 2                             | 2                                              | ns                                                                                                                        |
| <b>3<sup>rd</sup> trimester</b>           | 18                                  | 47                          | 7                             | 4                                              |                                                                                                                           |
| <b>Weight<br/>Newborn<br/>(gr)</b>        | 2869±754                            | 2730±605                    | 2038±550                      | 1817±814                                       | ns                                                                                                                        |
| <b>Apgar score</b>                        | 7.5±1.5                             | 7.9±1.0                     | 4.6±4.1                       | 7.5±1.0                                        | ns                                                                                                                        |
| <b>Hospital<br/>days</b>                  | 2.8±1.6                             | 5.4±5.8                     | 14.3±8.0                      | 15.6±9.7                                       | <b>a vs c</b><br><br><b>&lt;0.0001</b><br><br><b>a vs d</b><br><br><b>0.004</b><br><br><b>b vs c</b><br><br><b>0.0009</b> |
| <b>Leucocytes<br/>(10<sup>3</sup>xμL)</b> | 9.2±2.1                             | 7.9±2.7                     | 9.9±4.1                       | 10.2±4.4                                       | ns                                                                                                                        |
| <b>PLT<br/>(10<sup>3</sup>xμL)</b>        | 259±90.7                            | 222.8±87.4                  | 217.9±47.5                    | 211.7±73.1                                     | ns                                                                                                                        |

|                |          |           |          |           |               |
|----------------|----------|-----------|----------|-----------|---------------|
| <b>PMN (%)</b> | 75.3±8.2 | 73.7±18.0 | 85.6±7.6 | 56.6±41.7 | <b>a vs c</b> |
|                |          |           |          |           | <b>0.048</b>  |

536 BMI; Body Mass Index. Kruskal–Wallis test and Dunn's multiple comparisons test. Significant  $p < 0.05$ .  
 537 Mean±SD.

538

539

540

**Table 2. Arterial Blood Gas parameters of pregnant women with COVID-19**

|                          | <b>Survivor</b>                     |                             |                               |                                     | <i>p</i>                      |
|--------------------------|-------------------------------------|-----------------------------|-------------------------------|-------------------------------------|-------------------------------|
|                          | Asymptomatic<br>(n=20) <sup>a</sup> | Mild<br>(n=56) <sup>b</sup> | Severe<br>(n=10) <sup>c</sup> | Fatal Outcome<br>(n=6) <sup>d</sup> |                               |
| <b>pH</b>                | 7.3±0.04                            | 7.3±0.03                    | 7.3±0.08                      | 7.4±0.08                            | ns                            |
| <b>CO<sub>2</sub></b>    | 32.0±2.3                            | 27.8±4.0                    | 34.3±6.9                      | 31.4±6.4                            | <b>b vs c</b><br><b>0.005</b> |
| <b>O<sub>2</sub></b>     | 66.1±31.1                           | 78.3±16.9                   | 64.2±15.2                     | 65.1±21.3                           | ns                            |
| <b>Sat O<sub>2</sub></b> | 79.8±22.6                           | 85.6±22.4                   | 84.0±19.5                     | 83.8±16.6                           | ns                            |
| <b>Lactate</b>           | 2.1±0.8                             | 10.0±26                     | 0.7±5.4                       | 2.4±1.5                             | ns                            |
| <b>BE</b>                | -6.8±3.3                            | -6.6±3.5                    | -4.5±3.6                      | -2.9±1.3                            | <b>b vs d</b><br><b>0.023</b> |

541 BE; Basic excess. Kruskal–Wallis test and Dunn's multiple comparisons test. Significant  $p < 0.05$ .  
 542 Mean±SD.

543

544

**Table 3. Clinical chemistry parameters of pregnant women with COVID-19**

|                               | <b>Survivor</b>                     |                             |                               |                                     | <i>p</i> |
|-------------------------------|-------------------------------------|-----------------------------|-------------------------------|-------------------------------------|----------|
|                               | Asymptomatic<br>(n=20) <sup>a</sup> | Mild<br>(n=56) <sup>b</sup> | Severe<br>(n=10) <sup>c</sup> | Fatal Outcome<br>(n=6) <sup>d</sup> |          |
| <b>Creatinine<br/>(mg/dL)</b> | 0.5±0.08                            | 0.2±1.7                     | 0.8±0.8                       | 0.5±0.2                             | ns       |
| <b>D-Dimer<br/>(ng/mL)</b>    | 2261±1254                           | 2022±2035                   | 3303±3825                     | 11360±17192                         | ns       |

|                |           |            |         |         |               |
|----------------|-----------|------------|---------|---------|---------------|
| <b>PCT</b>     | 0.07±0.06 | 496.2±1129 | 1.3±2.7 | 0.3±0.1 | <b>a vs c</b> |
| <b>(ng/mL)</b> |           |            |         |         | <b>0.040</b>  |
| <b>Albumin</b> | 3.2±0.2   | 3.1±0.4    | 2.7±0.3 | 2.6±0.1 | <b>a vs c</b> |
| <b>(g/dL)</b>  |           |            |         |         | <b>0.021</b>  |
|                |           |            |         |         | <b>a vs d</b> |
|                |           |            |         |         | <b>0.005</b>  |
|                |           |            |         |         | <b>b vs c</b> |
|                |           |            |         |         | <b>0.036</b>  |
|                |           |            |         |         | <b>b vs d</b> |
|                |           |            |         |         | <b>0.010</b>  |

545 PCT; Procalcitonin. Kruskal–Wallis test and Dunn’s multiple comparisons test. Significant  $p < 0.05$ .  
 546 Mean±SD.

547

548 **Figure legends**

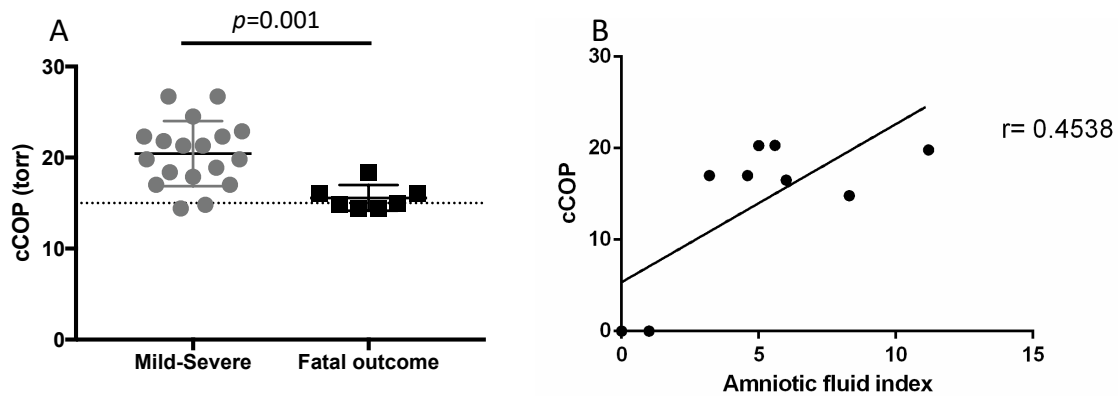

549

550 **Fig. 1. Colloido-Osmotic Pressure calculated in severe and fatal outcome pregnant women with**  
 551 **COVID-19.** The cCOP was calculated as described in the methods. A) Pregnant women with Mild-Severe  
 552 COVID-19 have a higher cCOP than in pregnant women with fatal outcome, B) Spearman correlation  
 553 between cCOP and amniotic fluid index. The correlation value (among mild, severe COVID-19 and fatal  
 554 outcome patients) suggesting a medium correlation,  $p = 0.22$ . The results are expressed as the mean±SD.  
 555 Significance value was  $p < 0.05$ . U Mann-Whitney tests were calculated.

556

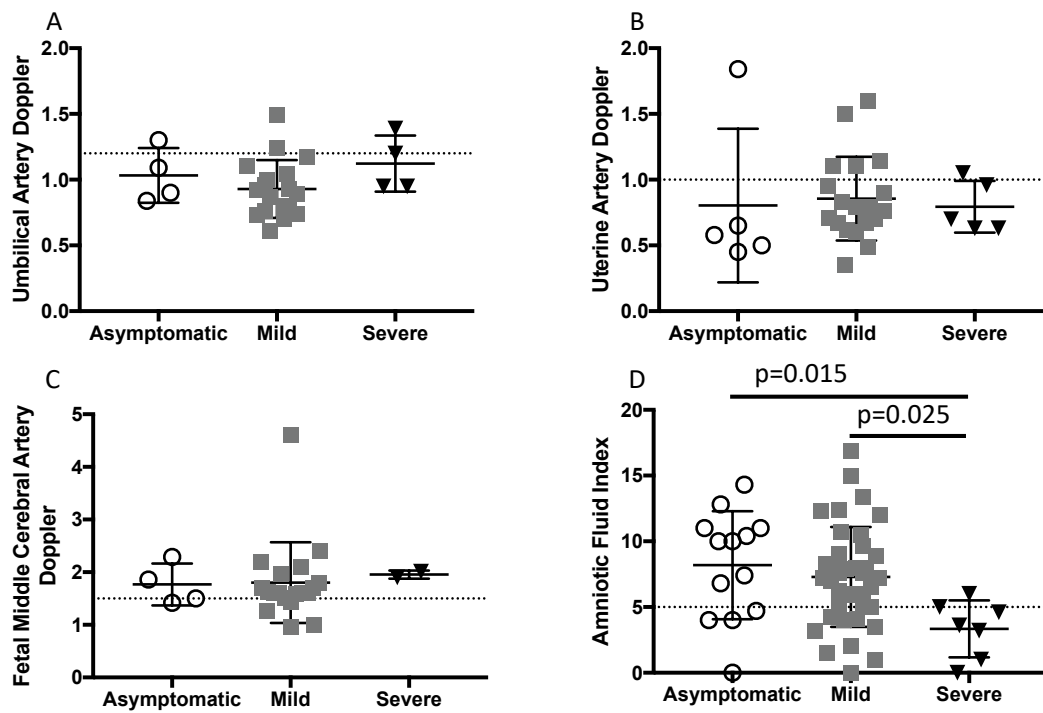

557

558 **Fig. 2. Maternal-fetal Doppler test in pregnant women with COVID-19.** Pregnant women were tested  
559 by USG as described in the methods. Doppler analysis is shown for A) Umbilical artery, B) Uterine artery,  
560 C) Fetal middle cerebral artery, and D) Amniotic fluid index. Dash line indicate normal limits. The results  
561 are expressed as the mean±SD. Significance value was  $p<0.05$ . Kruskal–Wallis and Dunn's multiple  
562 comparisons tests were calculated.
